# Supplementary material for: Analysis of Ser/Thr Kinase HASPIN-Interacting Proteins in the Spermatids
Source: MDPI journal article supplement (doi:10.3390/ijms23169060), 2022-08-13
Supplement: s1 [file s1]

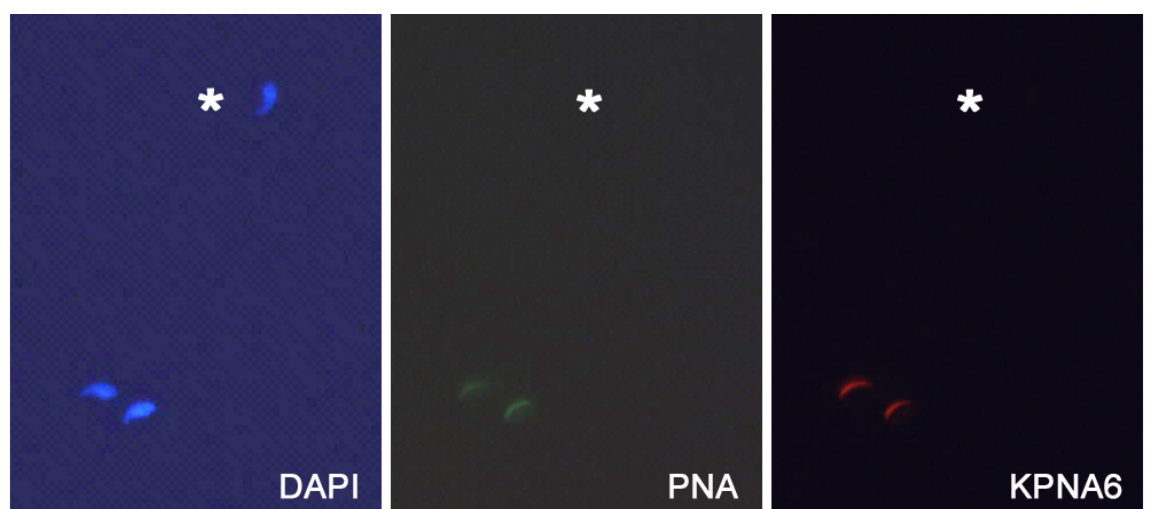

**Figure S1** Sperm were stained with DAPI, FITC-PNA, the anti-KPNA6 antibodies. KPNA6 is not observed in sperm that have completed the acrosome reaction (star). Bar=50mM.
